# Supplementary material
Source: publisher figshare collection journal article supplement (https://geolsoc.figshare.com/ndownloader/files/30547827)
Supplement: Supplementary file 1 [file 30547827]

## Sheet: S1 Mineral assemblages
	Table S1. Mineral assemblages of samples that have been analysed, or shown in photographs, photomicrographs or BSE images
																			Figure no. for:
	Sample no.	Location	Grid	Metamorphic	Ms	Chl	Bt	Crd	And	St	Grt	Sil	Kfs	migm	Ky	Other	Chemical	U-Pb	Photo/BSE image/
			reference	zone													analyses	Mnz	Photomicrograph
	1. NE and E Buchan: Crovie to St. Combs via Fraserburgh; and Collieston (refer to Fig. 1b in main paper)
	16-SR-11	Crovie	NJ807657	Chl-Bt	x	x	x										WR
	16-SR-1A	Rosehearty	NJ931678	Crd-And	x		x	x	x								n/a		3f; 4e
	16-SR-1B	Rosehearty	NJ931678	Crd-And	x		x	x	x								WR
	16-SR-4	Sandhaven	NJ970671	Crd-And			x	x	x								n/a		4f
	16-SR-5B	Meikle Bawdley (Fraserburgh)	NJ988674	Sil	x		x	x	x								WR
	16-SR-7A	Broadsea shore (Fraserburgh)	NJ992674	Kfs	2		x		a			?	x			Crn	n/a		5b
	16-SR-8	West Haven	NK034654	migm/gneiss	2		x							x			n/a		5c
	16-SR-8B	West Haven	NK034654	migm/gneiss			x	x	x			x		x			n/a		5d
	16-SC-2A	Slains Castle	NK053299	Crd-And	x		x	a	x								n/a		3e
	16-SC-3B	Collieston	NK040285	Crd-And	x		x	x	x								WR
	2. Central SE Buchan: Ythan River sequence (west to east) from Fyvie to Methlick, and Ellon Gneisses (refer to Fig. 2 in main paper)
	07-Y-1	Ardlogie	NJ775373	Chl-Bt	x	x	x										WRMsPl
	43973	Ardlogie to the Ords	NJ783369	Chl-Bt	x	x	x										WR
	43978	Ardlogie to the Ords	NJ787366	Crd	x		x	a									WR
	43981	Ardlogie to the Ords	NJ789366	Crd	x		x	a									WR
	07-Y-2	The Ords	NJ789366	Crd-And	x		x	x	x								WRBtMsPl		3d
	43993	Blaikie Burn	NJ804381	Crd-And	x		x	x	x								BtCrd
	07-Y-3B	Fetterletter	NJ807387	Crd-And	x		x	x	x								WRBtMsPl		4c
	43998	Fetterletter	NJ808388	Crd-And	x		x	x	x								WR
	07-Y-4	Braes of Gight	NJ819391	Crd-And	x		x	x	x								WRBtMsPl		4d
	44013	Braes of Gight	NJ821388	Crd-And	x		x	x	x								BtCrd
	44029	Waterloo Bridge	NJ841392	Crd-And	x		x	x	x								Crd
	07-Y-6	Chapelhaugh	NJ844393	Crd-And	x		x	a	x								BtMsPl
	07-Y-7	Gowkstone	NJ845390	Sil	x		x	a	x			x	x				BtMsPl
	18-SY-1A	Poleburn Wood	NJ849383	Sil	x		x	a	x			x					n/a		5a
	07-Y-9	E of Methlick	NJ862369	Kfs/Migm	x/2?		x		x			x		x			BtMsPl	x	S4a
	07-Y-10	E of Methlick	NJ862369	Kfs/Migm	2		x							x			BtPl
	07-Y-11	N of Tarves	NJ860320	Ellon gneiss	2		x	x				x	x	x			BtMsPl	x	S4b
	16-SY-1	N of Tarves	NJ865319	Ellon gneiss	2		x	x			x	x	x	x			n/a		5e
	16-SY-2	N of Tarves	NJ868323	Ellon gneiss	2		x	x	x		x	x		x			WR
	16-SY-3B	E of Tarves	NJ842304	Ellon gneiss	2		x	x	x		x	x		x			WR		5f
	3. S and SW Buchan: Correen Hills, and localities in Huntly-Cabrach-Ardwell region (refer to Figs. 1b and 6 in main paper)
	18-SCH-1E	Correen Hills	NJ522213	Crd-And	x		x	x	x							little Bt; Pl porphs; Mt	WR
	18-SH-2A	Bridgend	NJ514358	St-And	x		x		x	x	x						WR
	18-SH-3	Tillathrowie (float sample)	NJ471351	Crd-And	x		x	a									WR
	18-SH-8	Hillock of Echt burn	NJ402322	And	x		x	a	x								WR
	18-SH-11	Hillock of Echt burn	NJ407316	And	x		x		x		x					Mt	WR
	18-SH-20A	Ardwell/Deveron	NJ383305	St-And	x		x	a	x		x						WR
	18-SH-20B	Ardwell/Deveron	NJ383305	St-And	x		x		x	x							WR		7b
	18-SH-17B	Deveron/Cabrach	NJ380288	Sil	x		x		x			x					WR
	18-SH-15	Aldivalloch	NJ359265	migm	2		x	x	x			x	x	x			n/a
	18-SH-16B	Aldivalloch	NJ359264	migm	2		x	x			x	x	x	x			n/a
	4. W Buchan: localities between Milltown of Rothiemay and NW Buchan coastal sequence (refer to Fig. 1b in main paper)
	18-SD-1A	Fourman Hill/Woodfold Wood	NJ568474	St?+And±Sil	x		x		x			x					n/a		7d
	43945	Kinnairdy	NJ611498	St+And±Sil	x		x		x	x	x	x					WRBtStGrtPl
	07-Bu-12A	Kinnairdy	NJ611500	St+And±Sil	x		x		x	x	x						BtMsStGrtPl	x	S4f
	07-Bu-12B	Kinnairdy	NJ611500	St+And±Sil	x		x		x	x	x	x					BtMsStGrtPl
	43943	Kinnairdy	NJ611501	St+And±Sil	x		x		x	x		x					WR
	07-Bu-13	Maunderlea	NJ663563	St+And±Crd	x		x	a	x	x	x						WRBtMsStGrtPl		7a,c
	43939	Maunderlea	NJ663564	St+And±Crd	x		x		x	x	x						BtStGrt
	5. NW Buchan coastal sequence (east to west) from Old Haven to Portsoy (refer to Fig. 8 in main paper)
	43849	Old Haven	NJ739647	Chl-Bt	x	x											WR
	43852	Old Haven	NJ734645	Chl-Bt	x	x	x										WRBtChl
	43857	Tarlair	NJ719647	Chl-Bt	x	x	x										BtMsChl
	43858	Tarlair	NJ719647	Chl-Bt	x	x	x										Chl
	02-Bu-1	Tarlair	NJ719647	Chl-Bt	x	x	x										WRBtMsChl
	43859	MacDuff	NJ709649	Chl-Bt	x	x	x										Chl
	43860	MacDuff	NJ709649	Chl-Bt	x	x	x										WRBtChl
	43864	Banff	NJ689647	Chl-Bt	x		x										Bt
	43865	Banff	NJ688647	Chl-Bt	x		x										Ms
	43867	Banff	NJ687647	Crd	x		x	a									BtMs
	02-Bu-2	Banff	NJ687647	Crd	x	x?	x	a									WRBtMs		3a,b
	43870	Banff	NJ685646	Crd	x	x	x	a									Bt
	43876	Banff	NJ684646	Crd-And	x		x	x	x								WRBtMsCrd
	02-Bu-3	Banff	NJ684646	Crd-And	x		x	x	x								WRBtMsCrdPl		3c; 4a
	43873	Banff	NJ683646	Crd-And	x		x	x									BtCrd
	43874	Banff	NJ683646	Crd-And	x		x	x									WR
	02-Bu-4	Banff	NJ682646	Crd-And	x		x	x	x								n/a		4b
	07-Bu-1	Banff	NJ682646	Crd-And	x		x	x									BtMsCrdPl
	07-Bu-2	Banff	NJ680646	Crd-And	x		x	x	x								WRBtMsPl
	43899	Boyndie Bay	NJ664651	±St±And±Crd	x		x	x	x	x							WR
	43901	Boyndie Bay	NJ664651	±St±And±Crd	x		x	x	x								WRBtCrd
	43904	Boyndie Bay	NJ664651	±St±And±Crd	x		x	x	x	x							WR
	43907	Boyndie Bay	NJ664651	±St±And±Crd	x		x		x	x							WR
	02-Bu-5A	Boyndie Bay	NJ665651	±St±And±Crd	x		x	a	x	x	x						WRBtMsStPl		7e; 9b
	02-Bu-5B	Boyndie Bay	NJ665651	±St±And±Crd	x		x	a	x	x	x						WRBtMsStGrtPl	x	7e; 9a, c; 10a to c; S4c
	07-Bu-4	Boyndie Bay	NJ664651	±St±And±Crd	x		x	x	x	x							BtMsCrdStPl		7f
	07-Bu-5	Boyndie Bay	NJ664651	±St±And±Crd	x		x	x	x	x							n/a		9d
	43911	Boyndie Bay	NJ663652	±St±And±Crd	x		x		x	x							WR
	43912	Boyndie Bay	NJ663652	±St±And±Crd	x		x		x	x							WR
	43913	Boyndie Bay	NJ663652	±St±And±Crd	x		x			x							WR
	15463	Boyndie Bay	NJ663652	±St±And±Crd	x		x		x	x	x						BtStGrt
	43916	Whitehills	NJ654655	±St±And±Crd	x		x		x	x							WR
	43918	Whitehills	NJ653656	±St±And±Crd	x		x		x	x	x						WRBtGrtPl
	43919	Whitehills	NJ653656	±St±And±Crd	x		x	x	x								WRBt
	16-SB-1	Whitehills Bay	NJ653655	±St±And±Crd	x		x	a		x	x	x					WR
	16-SB-3	Whitehills - Craig Neen	NJ650655	±St±And±Crd			x	x	x	x							WR		9e
	43921	Stake Ness	NJ644660	±St±And±Crd	x		x		x								WR
	43922	Stake Ness	NJ642659	±St±And±Crd	x		x		x								WRBt
	43929	Den Brae	NJ637658	Sil	x		x		x	x							WRBtStPl
	07-Bu-7A	Den Brae	NJ635656	Sil	x		x	x	x	x		x					WRBtMsPl		10d
	07-Bu-7B	Den Brae	NJ635656	Sil	x		x	a	x			x					BtMsPl
	43931	Whyntie Head	NJ634659	Sil	x		x		x								WRBt
	18-SP-2A	Old Hythe	NJ614663	Sil+Kfs	x		x					x	x				n/a		10e,f
	07-Bu-10A	E Links Bay Portsoy	NJ595663	Cowhythe gneiss	2		x					x	x	x			n/a		11a to c
	07-Bu-10B	E Links Bay Portsoy	NJ595663	Cowhythe gneiss	2		x					x	x	x			BtMsPl	x	11a,b; S4d
	07-Bu-11	E Links Bay Portsoy	NJ595663	Cowhythe gneiss	2		x				x	x	x	x			WRBtMsGrtPl	x	11d; S4e
	6. Aureole of the Insch and Boganclogh intrusions (refer to Figs. 6 and 12 in main paper)
	16-SI-1	Insch - Tillymorgan Hill	NJ654348	Slate	x	x											WR
	16-SI-6	Insch - Tillymorgan Hill	NJ657346	Spotted slate	x	x		a	a								WR		13a
	16-SI-8	Insch - Tillymorgan quarry	NJ659341	Spotted hornfels	x	x		a	a								WR		13b
	16-SI-10A	Insch - Hillbrae quarry	NJ657328	Hornfels	2		x	a	x			x	?				n/a		13c,d
	16-SI-11B	Insch - Cairnhill quarry	NJ669328	Hornfels	2		x	x	x			x	x	x			WR
	18-SH-23c	Boganclogh - Clayhooter Hill	NJ440238	Hornfels	2		x	x	x			x	x	x			n/a		11f
	18-SH-24	Boganclogh - Clayhooter Hill	NJ438239	Hornfels	2		x	x	x			x	x	x			n/a		13e,f
	18-SH-25	Boganclogh - Clayhooter Hill	NJ435243	Hornfels migm	2		x	x	x			x	x	x			n/a		11e
	7. Barrovian domain: coastal samples (west to east) between Crathie Point and Portsoy (refer to Fig. 8 in main paper)
	16-SP-4B	Crathie Pt	NJ549672	Ky-St			x			x					x		n/a	x	14a,b; S4g
	07-P-3	Crathie Pt	NJ549671	Ky-St	x		x			x	x						BtMsStGrtPl
	16-SP-4A	Crathie Pt	NJ549671	Ky-St	x		x			x	x				x		WR
	02-Bar-4	Castle Point	NJ581665	Ky-St	x		x			x	x						WR	x	S4h, i
	02-Bu-6A	Portsoy swimming pool	NJ584664	Ky-St	x		x		x/P	x	x	x			x	AndSil predates StKyGrt	n/a		14c,e,f
	02-Bu-6B	Portsoy swimming pool	NJ584664	Ky-St	x		x		x/P	x	x	x			x	AndSil predates StKyGrt	WRBtMsStGrt	x	14c,d; S4j,k
	All assemblages + Pl + Qtz + Ilm; unless indicated otherwise, hand samples show no sign of magnetism and so magnetite is assumed to be absent or rare; secondary chlorite has been ignored
	Mineral abbreviations from Kretz (1983)
	migm - samples that are gneissic or migmatitic, or have textures/structures (macroscopic or microscopic) indicative of partial melting
	WR - whole rock chemical analysis
	n/a - not analysed
	a - altered
	P - pseudomorphed
	2 - mineral is secondary
	15463 and 43xxx sample numbers from Hudson (1975; 1980); all other samples from this study

## Sheet: S2 WR-MinChem summary
	Table S2. Summary of key whole rock and mineral chemical parameters for analysed samples
	Mineral assemblages listed in Table S1; raw data in Tables S3 to S11
	Sample	Metamorphic	WR	WR	WR	WR	WR	Bt	Bt	Ms	Ms	Chl	Crd	St	St	St	Grt (c)	Grt (c)	Grt (c)	Pl
	no.	zone	LOI	A'	Mg#	Mg# -S-Ti	Ca#	Mg#	Ti	Si	K#	Mg#	Mg#	Mg#	Zn#	Mn#	Mg#	Xsps	Xgrs	Xan
	1. NE and E Buchan: Crovie to St. Combs via Fraserburgh; and Collieston (refer to Fig. 1b in main paper)
	16-SR-11	Chl-Bt	3.84	0.145984	0.407996	0.483796	0.236861
	16-SR-1B	Crd-And	3.45	0.266938	0.387077	0.420485	0.208937
	16-SR-5B	Sil	2.32	0.453789	0.420046	0.468868	0.226345
	16-SC-3B	Crd-And	2.54	0.0261862	0.387301	0.415325	0.408895
	2. Central SE Buchan: Ythan River sequence (west to east) from Fyvie to Methlick, and Ellon Gneisses (refer to Fig. 2 in main paper)
	07-Y-1	Chl-Bt	3.23	-0.140558	0.473402	0.540033	0.0866704			3.09278	0.954211									0.0621078
	43973	Chl-Bt	2.46	-0.0433545	0.372769	0.427017	0.185574
	43978	Crd	2.88	0.0662208	0.341768	0.383487	0.158745
	43981	Crd	2.49	0.0291014	0.436784	0.452929	0.308821
	07-Y-2	Crd-And	3.14	0.0713849	0.329129	0.367686	0.192112	0.388118	0.0855108	3.07117	0.82551									0.259805
	43993	Crd-And						0.400532	0.0825405				0.528554
	07-Y-3B	Crd-And	2.3	0.181874	0.336808	0.371653	0.307574	0.35385	0.0858173	3.04423	0.823404									0.319474
	43998	Crd-And	2.39	0.10907	0.355052	0.385339	0.380258
	07-Y-4	Crd-And	1.94	0.271036	0.329644	0.4055	0.31748	0.38475	0.0836885	3.0542	0.814155									0.314805
	44013	Crd-And						0.430657	0.107207				0.557446
	44029	Crd-And											0.540033
	07-Y-6	Crd-And						0.445609	0.166797	3.06008	0.900943									0.18824
	07-Y-7	Sil						0.444258	0.185117	3.07355	0.927355									0.275671
	07-Y-9	Kfs/Migm						0.449446	0.120198	3.08523	0.866515									0.209616
	07-Y-10	Kfs/Migm						0.394114	0.187976											0.333457
	07-Y-11	Ellon gneiss						0.406431	0.169624	3.07173	0.915344									0.241991
	16-SY-2	Ellon gneiss	1.72	0.0158855	0.373976	0.430717	0.264068
	16-SY-3B	Ellon gneiss	1.46	0.427074	0.37016	0.401781	0.258035
	3. S and SW Buchan: Correen Hills, and localities in Huntly-Cabrach-Ardwell region (refer to Figs 1b and 6 in main paper)
	18-SCH-1E	Crd-And	3.9	0.356527	0.22422	0.243549	0.283564
	18-SH-2A	St-And	2.4	0.0675702	0.395011	0.423127	0.326769
	18-SH-3	Crd-And	4	0.158907	0.355726	0.402573	0.159892
	18-SH-8	And	3.7	0.199075	0.425903	0.454913	0.155554
	18-SH-11	And	2.5	0.203251	0.319192	0.341672	0.176222
	18-SH-20A	St-And	2.8	0.285893	0.31571	0.341816	0.182137
	18-SH-20B	St-And	2.5	0.193941	0.270495	0.294674	0.162829
	18-SH-17B	Sil	3.3	0.0690943	0.350365	0.375695	0.142476
	4. W Buchan: localities between Milltown of Rothiemay and NW Buchan coastal sequence (refer to Fig. 1b in main paper)
	43945	St+And±Sil	1.76	0.240263	0.410101	0.439336	0.331968	0.433214	0.0999734					0.162895	n/a	0.024738	0.106035	0.163094	0.0438417	0.308336
	07-Bu-12A	St+And±Sil						0.420468	0.0983324	3.0441	0.850147			0.137067	0.0386937	0.0241436	0.110105	0.164499	0.0485392	0.271769
	07-Bu-12B	St+And±Sil						0.424482	0.105089	3.05636	0.847737			0.134472	0.0401085	0.0225986	0.108013	0.152656	0.0450493	0.264086
	43943	St+And±Sil	1.63	0.219584	0.407368	0.43681	0.307371
	07-Bu-13	St+And±Crd	1.65	0.348566	0.366949	0.399098	0.253931	0.434242	0.0851786	3.04516	0.803063			0.163978	0.00708794	0.0260194	0.109755	0.219629	0.0367559	0.235008
	43939	St+And±Crd						0.42142	0.0861489					0.161858	n/a	0.0265568
	5. NW Buchan coastal sequence (east to west) from Old Haven to Portsoy (refer to Fig. 8 in main paper)
	43849	Chl-Bt	4.07	0.190466	0.349894	0.377312	0.20048
	43852	Chl-Bt	3.27	0.158019	0.379009	0.41398	0.196837	0.429366	0.099043			0.433104
	43857	Chl-Bt						0.474206	0.0750789	3.15531	0.944445	0.489235
	43858	Chl-Bt										0.483675
	02-Bu-1	Chl-Bt	3.94	0.17192	0.439137	0.61115	0.232805	0.486529	0.0790638	3.09425	0.927546	0.538027
	43859	Chl-Bt										0.43263
	43860	Chl-Bt	3.95	0.216943	0.379959	0.407582	0.20762	0.37602	0.0881089			0.409788
	43864	Crd						0.428022	0.0842857
	43865	Crd								3.12639	0.943779
	43867	Crd						0.409497	0.0854925	3.08868	0.946819
	02-Bu-2	Crd	2.81	0.0932921	0.373772	0.429468	0.184816	0.401961	0.0826308	3.08622	0.856738
	43870	Crd						0.397154	0
	43876	Crd-And	2.89	0.143815	0.356703	0.402686	0.237205	0.426088	0.0718617	3.04865	n/a		0.563066
	02-Bu-3	Crd-And	2.25	0.100812	0.416025	0.464649	0.148886	0.431722	0.0718601	3.07762	0.782261		0.580932							0.152569
	43873	Crd						0.506307	0.0769657				0.646077
	43874	Crd-And	3.08	0.0765637	0.422894	0.466002	0.202098
	07-Bu-1	Crd-And						0.468621	0.0735863	3.06591	0.795296		0.591259							0.183843
	07-Bu-2	Crd-And	2.37	0.0401278	0.367084	0.443985	0.206315	0.390694	0.0824102	3.06257	0.788449									0.261574
	43899	±St±And±Crd	4.02	0.254384	0.396455	0.424976	0.153243
	43901	±St±And±Crd	3.87	0.201267	0.433685	0.468524	0.132471	0.480276	0.0758574				0.536898
	43904	±St±And±Crd	3.57	0.205718	0.380552	0.408401	0.210063
	43907	±St±And±Crd	2.45	0.145845	0.422738	0.454673	0.252658
	02-Bu-5A	±St±And±Crd	2.83	0.298143	0.408909	0.443332	0.226903	0.404949	0.10389	3.05768	0.826798			0.156069	0.029548	0.0377035				0.279348
	02-Bu-5B	±St±And±Crd	2.31	0.183006	0.418506	0.479004	0.451187	0.441251	0.0805496	3.06168	0.829149			0.166617	0.0389182	0.0430099	0.101561	0.256568	0.035521	0.3109
	07-Bu-4	±St±And±Crd						0.401569	0.0885152	3.06062	0.810611		0.577621	0.14638	0.0443289	0.0226059				0.21942
	43911	±St±And±Crd	3.76	0.307987	0.403953	0.431853	0.371898
	43912	±St±And±Crd	2.9	0.297465	0.351679	0.376028	0.499609
	43913	±St±And±Crd	2.4	0.0171993	0.419513	0.448163	0.391153
	15463	±St±And±Crd						0.40146	0.0902547					0.154478	n/a	0.0344033	0.107739	0.182508	0.0367297
	43916	±St±And±Crd	2.75	-0.0739137	0.463184	0.489941	0.151585
	43918	±St±And±Crd	3.84	0.160759	0.393132	0.422612	0.304805	0.445913	0.107673								0.0989416	0.231065	0.0491552	0.302181
	43919	±St±And±Crd	4.88	0.0797979	0.488781	0.545907	0.42205	0.484802	0.106466								0.0927018	0.153558	0.0445398
	16-SB-1	±St±And±Crd	3.12	0.152778	0.440552	0.470657	0.264148
	16-SB-3	±St±And±Crd	2.31	0.17629	0.472436	0.546122	0.247253
	43921	±St±And±Crd	5.51	0.221914	0.430487	0.457148	0.46547
	43922	±St±And±Crd	3.82	0.406262	0.435837	0.485951	0.274739	0.44961	0.126867
	43929	Sil	3.47	0.125252	0.402034	0.425887	0.149191	0.485288	0.121173					0.170256	n/a	0.0253202				0.17527
	07-Bu-7A	Sil	2.81	0.128367	0.455291	0.482598	0.161083	0.454175	0.126132	3.04268	0.862301									0.165532
	07-Bu-7B	Sil						0.547096	0.11814	3.03687	0.809482									0.123821
	43931	Sil	4.25	0.226616	0.439847	0.475736	0.223497	0.467091	0.163895
	07-Bu-10B	Cowhythe gneiss						0.410667	0.159416	3.04751	0.918307									0.237519
	07-Bu-11	Cowhythe gneiss	2.84	0.00706545	0.367319	0.397992	0.155554	0.410738	0.180766	3.06021	0.901512						0.147618	0.182635	0.0222753	0.156724
	6. Aureole of the Insch and Boganclogh intrusions (refer to Figs. 6 and 12 in main paper)
	16-SI-1	Slate	3.42	0.320152	0.257548	0.279189	0.140868
	16-SI-6	Spotted slate	3.31	0.355558	0.255657	0.277609	0.137444
	16-SI-8	Spotted hornfels	3.42	0.342695	0.243593	0.262779	0.0126887
	16-SI-11B	Hornfels	1.09	0.166531	0.350235	0.40567	0.173438
	7. Barrovian domain: coastal samples (west to east) between Crathie Point and Portsoy (refer to Fig. 8 in main paper)
	07-P-3	Ky-St						0.57749	0.0968603	3.08347	0.840298			0.163294	0.0356904	0.00530295	0.131924	0.0883374	0.136915	0.378021
	16-SP-4A	Ky-St	2.3	0.0221123	0.523804	0.550655	0.472771
	02-Bar-4	Ky-St	3.01	0.227565	0.38438	0.420746	0.175591
	02-Bu-6B	Ky-St	4.84	0.302544	0.44106	0.47482	0.0587288	0.475355	0.0745644	3.06344	0.760392			0.146757	0.012703	0.0274338	0.106337	0.187882	0.0414077
	Mineral abbreviations from Kretz (1983)					Mg# = Mg/(Mg+Fe) assuming all Fe as Fe2+										Zn# in St = Zn/(Zn+Fe+Mn+Mg)
	WR = whole rock					Mg# -S-Ti = as above, then projected from Po, Ilm										Mn# in St = Mn/(Zn+Fe+Mn+Mg)
	Grt(c) = garnet cores (core and rim analyses in Table S10)					Ca# = Ca/(Ca+Na)										Xsps in Grt core = Mn/(Fe2++Mn+Mg+Ca)
	LOI = loss on ignition					Ti in Bt = Ti cations for 11 oyxgens in biotite formula unit										Xgrs in Grt core= Ca/(Fe2++Mn+Mg+Ca)
	A' = (Al-Na-2Ca-3K)/2					Si in Ms = Si cations for 11 oyxgens in muscovite formula unit										Xan = Ca/(Ba+Ca+Na+K)
						K# in Ms = K/(K+Na)										n/a = not analysed
	Summary of whole rock and mineral chemical analyses:
		G(17)	H(75)	Total
	WR	36	25	61
	Bt	25	19	44
	Ms	25	4	29
	Chl	1	5	6
	Crd	3	6	9
	St	8	4	12
	Grt	7	4	11	8 of 8 of G(17) and 1 of 4 of H(75) have core and rim analyses
	Pl	23	3	26
	Mnz	9	0	9
	H(75) = WR and mineral analyses from Hudson (1975)
	G(17) = mineral analyses from Goldsmith (2017); whole rock analyses from Goldsmith (2017) and from this study

## Sheet: S3 Whole rock
		Table S3. Rock compositions																				Table S3. Rock compositions																				Table S3. Rock compositions
	Wt %	43849	43852	43860	43874	43876	43899	43901	43904	43907	43911	43912	43913	43916	43918	43919	43921	43922	43929	43931	43943	43945	43973	43978	43981	43998	02-Bar-4	02-Bu-1	02-Bu-2	02-Bu-3	02-Bu-5A	02-Bu-5B	02-Bu-6B	07-Bu-2	07-Bu-7A	07-Bu-11	07-Bu-13	07-Y-1	07-Y-2	07-Y-3B	07-Y-4	16-SB-1	16-SB-3	16-SC-3B	16-SI-1	16-SI-6	16-SI-8	16-SI-11B	16-SP-4A
	SiO2	53.9	57.8	57.79	56.43	51.46	52.25	55.51	53.75	52.33	53.34	50.48	54.24	57.36	56.03	48.34	51.07	47.95	48.81	49.67	57.93	57.15	56.86	56.21	69.3	56.94	52.26	57.91	55.37	58.98	53.57	55.33	60.58	55.75	47.54	57.2	58.26	56.86	57.52	56.31	54.78	55.62	50.54	52.63	56.05	56.6	56.15	59.86	63.07
	TiO2	1.07	1.06	0.82	1.14	1.44	1.06	0.88	0.98	1.34	1.03	1.08	0.77	0.75	1.09	1.12	0.8	1.13	0.98	1.04	1	1.09	1.56	1.23	0.49	1.18	1.202	1.171	1.178	1.153	0.923	0.923	0.879	1.065	0.91	1.16	1.056	1.401	1.471	1.283	1.193	0.95	1.31	1.14	0.99	0.95	0.98	1.47	0.76
	Al2O3	20.1	18.36	19.27	20.48	24.36	24.18	22.57	22.36	23.66	25.39	24.82	22.32	17.3	20.15	26.77	23.24	30.29	24.96	27	21.25	21.9	18.74	20.56	13.08	19.03	25.32	18.89	21.45	20.36	24.91	21.87	19.35	20.06	26.05	19.09	21.99	20.83	18.93	20.26	21.69	20.25	22.22	21.16	22.23	22.37	22.03	20.19	16.21
	All Fe as Fe2O3	9.57	7.79	7.5	7.11	8.11	9.53	6.7	8.9	11.01	9.5	10.81	6.99	7.37	9.48	5.47	7.81	6.18	10.46	7.72	8.79	9.66	7.7	7.44	7.74	9.68	8.63	7.97	8.53	7.23	7.56	8.12	7.18	9.66625	9.67	9.52	8.92	6.06	9.57	10.61	11.28	8.83	9.8	10.53	9.48	8.94	10.15	7.13	7.42
	MnO	0.11	0.11	0.13	0.09	0.06	0.05	0.03	0.07	0.11	0.1	0.11	0.07	0.06	0.12	0.03	0.04	0.06	0.07	0.04	0.13	0.21	0.11	0.07	0.1	0.1	0.069	0.086	0.08	0.069	0.098	0.136	0.065	0.079	0.074	0.13	0.184	0.126	0.152	0.133	0.134	0.1	0.1	0.18	0.06	0.26	0.11	0.08	0.06
	MgO	2.6	2.4	2.32	2.63	2.27	3.16	2.59	2.76	4.07	3.25	2.96	2.55	3.21	3.1	2.64	2.98	2.41	3.55	3.06	3.05	3.39	2.31	1.95	3.03	2.69	2.72	3.15	2.57	2.6	2.64	2.95	2.86	2.83	4.08	2.79	2.61	2.75	2.37	2.72	2.8	3.51	4.43	3.36	1.66	1.55	1.65	1.94	4.12
	CaO	1.03	1.02	0.55	0.77	1.66	0.56	0.42	0.64	1.56	0.9	2.15	3.29	0.86	0.96	1.11	0.52	0.85	1.32	0.5	1.59	1.16	0.87	0.7	0.76	1.51	0.37	1.23	0.8	0.88	1.11	2.41	0.07	1.35	1.23	0.5	0.93	0.34	0.71	1.27	1.17	0.76	1.48	1.79	0.54	0.47	0.04	1.01	0.86
	Na2O	2.27	2.3	1.16	1.68	2.95	1.71	1.52	1.33	2.55	0.84	1.19	2.83	2.66	1.21	0.84	0.33	1.24	4.16	0.96	1.98	1.29	2.11	2.05	0.94	1.36	0.96	2.24	1.95	2.78	2.09	1.62	0.62	2.87	3.54	1.5	1.51	1.98	1.65	1.58	1.39	1.17	2.49	1.43	1.82	1.63	1.72	2.66	0.53
	K2O	3.2	3.07	3.81	4.66	4.34	4.29	4.86	4.49	3.93	4.28	3.24	3.52	3.87	3.96	6.87	5.25	5.58	3.91	6.08	3.12	3.54	4.39	4.62	2.97	3.66	5.62	3.16	4.69	3.88	4.02	3.49	3.57	3.76	4.57	4.8	2.76	5.71	4.21	3.46	3.32	4.17	3.4	4.62	3.44	3.4	3.34	3.56	4.11
	P2O5	0.27	0.12	0.07	0.1	0.37	0.06	0.02	0.03	0.12	0.29	0.76	0.48	0.04	0.1	0.58	0.11	0.18	0.07	0.06	0.17	0.14	0.08	0.11	0	0.32	0.27	0.53	0.177	0.159	0.101	1.127	0.083	0.192	0.144	0.07	0.242	0.175	0.148	0.199	0.243	0.11	0.08	0.14	0.18	0.13	0.05	0.13	0.08
	LOI	4.07	3.27	3.95	3.08	2.89	4.02	3.87	3.57	2.45	3.76	2.9	2.4	2.75	3.84	4.88	5.51	3.82	3.47	4.25	1.63	1.76	2.46	2.88	2.49	2.39	3.01	3.94	2.81	2.25	2.83	2.31	4.84	2.37	2.81	2.84	1.65	3.23	3.14	2.3	1.94	3.12	2.31	2.54	3.42	3.31	3.42	1.09	2.3
	Total	98.19	97.3	97.37	98.17	99.91	100.87	98.97	98.88	103.13	102.68	100.5	99.46	96.23	100.04	98.65	97.66	99.69	101.76	100.38	100.64	101.29	97.19	97.82	100.9	98.86	100.431	100.277	99.605	100.341	99.852	100.286	100.097	99.9922	100.618	99.6	100.112	99.462	99.871	100.125	99.94	98.59	98.16	99.52	99.87	99.61	99.64	99.12	99.52
	All Fe as FeO	8.6112	7.00954	6.74859	6.39766	7.29748	8.57521	6.02874	8.00833	9.90693	8.54822	9.72697	6.28969	6.63162	8.53022	4.92197	7.02753	5.56084	9.41204	6.94655	7.90935	8.69219	6.92855	6.6946	6.96455	8.71018	7.76538	7.1715	7.6754	6.50564	6.80258	7.30647	6.46065	8.69781	8.70118	8.56621	8.02632	5.45286	8.6112	9.54701	10.1499	7.94534	8.81816	9.47502	8.53022	8.04432	9.13309	6.41566	6.67661
	FeO measured*	n/a	6.24	6.21	4.96	7.18	6.01	n/a	6.23	n/a	8.59	7.45	5.92	n/a	7.79	3.97	n/a	4.8	8.41	6.26	7.28	6.72	5.13	5.7	5.61	7.22	n/a	n/a	n/a	n/a	n/a	n/a	n/a	n/a	n/a	n/a	n/a	n/a	n/a	n/a	n/a	n/a	n/a	n/a	n/a	n/a	n/a	n/a	n/a
	S	n/a	n/a	n/a	n/a	n/a	n/a	n/a	n/a	n/a	n/a	n/a	n/a	n/a	n/a	n/a	n/a	n/a	n/a	n/a	n/a	n/a	n/a	n/a	n/a	n/a	0.0040045	1.13592	0.236425	0.0573844	0.0282437	0.337659	0.0138916	0.634673	0.0380507	0	0.0318638	0.00774069	0.0101594	0.087258	0.785042	0.024027	0.48054	0.00800899	0	0	0	0.0120135	0
		Moles elements x 100 assuming all Fe is Fe2+, except where Fe2+ and Fe3+ were measured																				Moles elements x 100 assuming all Fe is Fe2+, except where Fe2+ and Fe3+ were measured																				Moles elements x 100 assuming all Fe is Fe2+, except where Fe2+ and Fe3+ were measured
	Si	89.7062	96.1971	96.1804	93.917	85.6453	86.9601	92.3858	89.4566	87.0933	88.7742	84.0143	90.2721	95.4648	93.2512	80.4527	84.9963	79.8036	81.2349	82.6662	96.4134	95.1153	94.6326	93.5508	115.337	94.7657	86.9768	96.3801	92.1528	98.1609	89.157	92.0862	100.824	92.7852	79.1212	95.1985	96.9626	94.6326	95.731	93.7172	91.1708	92.5689	84.1142	87.5926	93.2845	94.1999	93.4509	99.6255	104.968
	Ti	1.33974	1.32722	1.02672	1.42739	1.80302	1.32722	1.10185	1.22706	1.67781	1.28966	1.35227	0.964115	0.939073	1.36479	1.40235	1.00168	1.41487	1.22706	1.30218	1.2521	1.36479	1.95327	1.54008	0.613528	1.47747	1.50502	1.46621	1.47497	1.44367	1.15569	1.15569	1.10059	1.33348	1.13941	1.45243	1.32221	1.75419	1.84184	1.60644	1.49375	1.18949	1.64025	1.42739	1.23958	1.18949	1.22706	1.84058	0.951594
	Al	39.4268	36.0138	37.7988	40.1722	47.783	47.4299	44.2718	43.8599	46.4099	49.8034	48.6853	43.7814	33.9345	39.5249	52.5103	45.5861	59.4149	48.9599	52.9614	41.6826	42.9576	36.7592	40.3291	25.6569	37.328	49.666	37.0534	42.0749	39.9368	48.8618	42.8988	37.9557	39.3484	51.098	37.4457	43.1341	40.8588	37.1318	39.7407	42.5457	39.7211	43.5853	41.5061	43.6049	43.8795	43.2126	39.6034	31.7965
	All Fe as Fe2+	11.986	9.75661	9.3934	8.90494	10.1574	11.9359	8.39143	11.1468	13.7895	11.8983	13.539	8.75464	9.23058	11.8733	6.85092	9.78166	7.74016	13.1007	9.66894	11.0091	12.0987	9.64389	9.31825	9.69398	12.1237	10.8087	10.8087	10.8087	10.8087	10.8087	10.8087	10.8087	10.8087	10.8087	10.8087	10.8087	10.8087	10.8087	10.8087	10.8087	10.8087	10.8087	10.8087	10.8087	10.8087	10.8087	10.8087	10.8087
	measured Fe2+	n/a	8.68549	8.64373	6.90385	9.99388	8.36535	n/a	8.67157	n/a	11.9565	10.3697	8.24008	n/a	10.8429	5.52586	n/a	6.68114	11.7059	8.71332	10.1331	9.3536	7.14047	7.93386	7.80859	10.0496	n/a	n/a	n/a	n/a	n/a	n/a	n/a	n/a	n/a	n/a	n/a	n/a	n/a	n/a	n/a	n/a	n/a	n/a	n/a	n/a	n/a	n/a	n/a
	measured Fe3+	n/a	1.07112	0.749667	2.00109	0.163516	3.57053	n/a	2.47526	n/a	-0.0581602	3.16932	0.514569	n/a	1.03031	1.32505	n/a	1.05902	1.39474	0.955612	0.875994	2.74509	2.50342	1.38439	1.8854	2.07419	n/a	n/a	n/a	n/a	n/a	n/a	n/a	n/a	n/a	n/a	n/a	n/a	n/a	n/a	n/a	n/a	n/a	n/a	n/a	n/a	n/a	n/a	n/a
	Mn	0.155067	0.155067	0.183261	0.126873	0.0845821	0.0704851	0.042291	0.0986791	0.155067	0.14097	0.155067	0.0986791	0.0845821	0.169164	0.042291	0.0563881	0.0845821	0.0986791	0.0563881	0.183261	0.296037	0.155067	0.0986791	0.14097	0.14097	0.0972694	0.121234	0.112776	0.0972694	0.138151	0.191719	0.0916306	0.111366	0.104318	0.183261	0.259385	0.177622	0.214275	0.18749	0.1889	0.14097	0.14097	0.253746	0.0845821	0.366522	0.155067	0.112776	0.0845821
	Mg	6.45097	5.95474	5.75625	6.52541	5.6322	7.84041	6.42616	6.84796	10.0983	8.06372	7.34418	6.32692	7.96447	7.69154	6.55022	7.39381	5.97956	8.80806	7.5923	7.56749	8.41108	5.73144	4.83823	7.51786	6.67428	6.74871	7.8156	6.37654	6.45097	6.55022	7.31937	7.09607	7.02164	10.1231	6.92239	6.47578	6.82314	5.88031	6.74871	6.9472	8.70881	10.9915	8.33664	4.1187	3.84577	4.09389	4.81342	10.2223
	Ca	1.83676	1.81893	0.980794	1.37311	2.96022	0.998627	0.74897	1.14129	2.78189	1.60494	3.83401	5.86693	1.53361	1.71193	1.97942	0.927296	1.51577	2.35391	0.891631	2.83539	2.06858	1.55144	1.24828	1.35528	2.69273	0.659807	2.19341	1.42661	1.56927	1.97942	4.29766	0.124828	2.4074	2.19341	0.891631	1.65843	0.606309	1.26612	2.26474	2.08642	1.35528	2.63923	3.19204	0.962962	0.838133	0.0713305	1.80109	1.53361
	Na	7.32506	7.42187	3.7432	5.42119	9.51935	5.518	4.90489	4.29178	8.22859	2.7106	3.84001	9.13213	8.58355	3.90455	2.7106	1.06488	4.00136	13.4239	3.09782	6.38926	4.1627	6.80876	6.61514	3.03329	4.38858	3.09782	7.22825	6.29245	8.97078	6.74422	5.22758	2.00068	9.2612	11.4232	4.84035	4.87262	6.38926	5.32438	5.0985	4.48539	3.77547	8.03498	4.61447	5.87296	5.25985	5.55027	8.58355	1.71026
	K	6.79434	6.51832	8.08952	9.89426	9.21483	9.10867	10.3189	9.53331	8.3443	9.08743	6.87927	7.47378	8.21691	8.408	14.5866	11.147	11.8476	8.30184	12.9093	6.62449	7.51624	9.32099	9.80933	6.306	7.77103	11.9326	6.70941	9.95796	8.23814	8.53539	7.41008	7.57994	7.98335	9.70317	10.1915	5.86012	12.1237	8.93881	7.34638	7.04913	8.85388	7.21899	9.80933	7.30392	7.21899	7.0916	7.55871	8.72649
	P	0.573273	0.254788	0.148626	0.212323	0.785596	0.127394	0.0424646	0.063697	0.254788	0.615737	1.61366	1.01915	0.0849293	0.212323	1.23147	0.233556	0.382182	0.148626	0.127394	0.36095	0.297253	0.169859	0.233556	0	0.679434	0.573273	1.12531	0.375812	0.337594	0.214446	2.39288	0.176228	0.407661	0.305745	0.148626	0.513822	0.371566	0.314238	0.422523	0.515945	0.233556	0.169859	0.297253	0.382182	0.27602	0.106162	0.27602	0.169859
	S	n/a	n/a	n/a	n/a	n/a	n/a	n/a	n/a	n/a	n/a	n/a	n/a	n/a	n/a	n/a	n/a	n/a	n/a	n/a	n/a	n/a	n/a	n/a	n/a	n/a	0.0124906	3.54309	0.737447	0.178991	0.0880964	1.05321	0.04333	1.97964	0.118686	0	0.099388	0.0241444	0.0316887	0.272171	2.44866	0.0749438	1.49888	0.0249813	0	0	0	0.0374719	0
	Oxidation ratio	n/a	0.109784	0.0798079	0.224717	0.0160982	0.299143	n/a	0.22206	n/a	-0.00488811	0.234088	0.0587767	n/a	0.0867761	0.193413	n/a	0.136821	0.106463	0.0988332	0.0795702	0.226892	0.259586	0.148568	0.194492	0.171085	n/a	n/a	n/a	n/a	n/a	n/a	n/a	n/a	n/a	n/a	n/a	n/a	n/a	n/a	n/a	n/a	n/a	n/a	n/a	n/a	n/a	n/a	n/a
	A'	0.179105	0.146627	0.205259	0.0699768	0.12952	0.241434	0.189131	0.194417	0.137005	0.293938	0.283667	0.0161176	-0.0739137	0.15124	0.0720491	0.211712	0.380299	0.119072	0.213164	0.20786	0.227919	-0.0376394	0.0594449	0.0280932	0.101367	0.227565	0.129813	0.0821879	0.0912248	0.28151	0.163676	0.302544	0.0334096	0.12199	0.00652447	0.329746	-0.121115	0.0643811	0.167682	0.232103	0.144417	0.15622	0.0244626	0.302851	0.336915	0.325827	0.147123	0.0221123
	Mg/(Mg+Fe)1	0.349894	0.379009	0.379959	0.422894	0.356703	0.396455	0.433685	0.380552	0.422738	0.403953	0.351679	0.419513	0.463184	0.393132	0.488781	0.430487	0.435837	0.402034	0.439847	0.407368	0.410101	0.372769	0.341768	0.436784	0.355052	0.38438	0.439137	0.373772	0.416025	0.408909	0.418506	0.44106	0.367084	0.455291	0.367319	0.366949	0.473402	0.329129	0.336808	0.329644	0.440552	0.472436	0.387301	0.257548	0.255657	0.243593	0.350235	0.523804
	Mg/(Mg+Fe)2	n/a	0.406738	0.39974	0.48591	0.360436	0.483804	n/a	0.441248	n/a	0.402779	0.414601	0.434332	n/a	0.414986	0.542413	n/a	0.472293	0.429369	0.465625	0.427528	0.473472	0.445267	0.378813	0.490516	0.399088	n/a	n/a	n/a	n/a	n/a	n/a	n/a	n/a	n/a	n/a	n/a	n/a	n/a	n/a	n/a	n/a	n/a	n/a	n/a	n/a	n/a	n/a	n/a
	Mg/(Mg+Fe)3	0.349894	0.379009	0.379959	0.422894	0.356703	0.396455	0.433685	0.380552	0.422738	0.403953	0.351679	0.419513	0.463184	0.393132	0.488781	0.430487	0.435837	0.402034	0.439847	0.407368	0.410101	0.372769	0.341768	0.436784	0.355052	0.384654	0.548288	0.390659	0.420884	0.41117	0.445324	0.442251	0.40946	0.457734	0.367319	0.369027	0.474196	0.329714	0.341446	0.37298	0.442228	0.504969	0.387751	0.257548	0.255657	0.243593	0.351192	0.523804
	Mg/(Mg+Fe)4	0.377312	0.41398	0.407582	0.466002	0.402686	0.424976	0.468524	0.408401	0.454673	0.431853	0.376028	0.448163	0.489941	0.422612	0.545907	0.457148	0.485951	0.425887	0.475736	0.43681	0.439336	0.427017	0.383487	0.452929	0.385339	0.420746	0.61115	0.429468	0.464649	0.443332	0.479004	0.47482	0.443985	0.482598	0.397992	0.399098	0.540033	0.367686	0.371653	0.4055	0.470657	0.546122	0.415325	0.279189	0.277609	0.262779	0.40567	0.550655
	Mn#	0.00759063	0.00876812	0.0112336	0.00749384	0.00449083	0.00338133	0.00270943	0.00513025	0.00578076	0.00649395	0.00623454	0.00468847	0.00449588	0.00788795	0.0027421	0.00310522	0.005521	0.00405065	0.00309667	0.0084862	0.0129419	0.0090779	0.00636498	0.00753525	0.00651683	0.00531107	0.00602787	0.00606345	0.00566417	0.00761735	0.00872298	0.00561974	0.00514468	0.00425232	0.00919957	0.0132573	0.011688	0.0110755	0.00833681	0.00808987	0.00662945	0.00541242	0.0101617	0.00496389	0.0225589	0.0091041	0.00720279	0.00400224
	Ca#	0.20048	0.196837	0.20762	0.202098	0.237205	0.153243	0.132471	0.210063	0.252658	0.371898	0.499609	0.391153	0.151585	0.304805	0.42205	0.46547	0.274739	0.149191	0.223497	0.307371	0.331968	0.185574	0.158745	0.308821	0.380258	0.175591	0.232805	0.184816	0.148886	0.226903	0.451187	0.0587288	0.206315	0.161083	0.155554	0.253931	0.0866704	0.192112	0.307574	0.31748	0.264148	0.247253	0.408895	0.140868	0.137444	0.0126887	0.173438	0.472771
		43xxx analyses from Hudson (1975); all other analyses from this study																				43xxx analyses from Hudson (1975); all other analyses from this study																				43xxx analyses from Hudson (1975); all other analyses from this study
		n/a = not analysed																				n/a = not analysed																				n/a = not analysed
		LOI = loss on ignition																				LOI = loss on ignition																				LOI = loss on ignition
		* FeO measured in Hudson samples (only) by the method of Wilson (1955)																				* FeO measured in Hudson samples (only) by the method of Wilson (1955)																				* FeO measured in Hudson samples (only) by the method of Wilson (1955)
		Oxidation ratio = ratio of Fe3/(Fe3 + Fe2) in moles = ratio of 2*Fe2O3/(2*Fe2O3 + FeO) in moles																				Oxidation ratio = ratio of Fe3/(Fe3 + Fe2) in moles = ratio of 2*Fe2O3/(2*Fe2O3 + FeO) in moles																				Oxidation ratio = ratio of Fe3/(Fe3 + Fe2) in moles = ratio of 2*Fe2O3/(2*Fe2O3 + FeO) in moles
		A' in molar AFM diagram projected from H2O, quartz, muscovite and plagioclase = (Al-3K-Na-2Ca)/2, normalised with Fe (for which all Fe is assumed to be Fe2) and Mg so that A'+F+M = 1.00																				A' in molar AFM diagram projected from H2O, quartz, muscovite and plagioclase = (Al-3K-Na-2Ca)/2, normalised with Fe (for which all Fe is assumed to be Fe2) and Mg so that A'+F+M = 1.00																				A' in molar AFM diagram projected from H2O, quartz, muscovite and plagioclase = (Al-3K-Na-2Ca)/2, normalised with Fe (for which all Fe is assumed to be Fe2) and Mg so that A'+F+M = 1.00
		1 assuming all Fe is Fe2+																				1 assuming all Fe is Fe2+																				1 assuming all Fe is Fe2+
		2 using value for Fe2+ from titration																				2 using value for Fe2+ from titration																				2 using value for Fe2+ from titration
		3 assuming all Fe is Fe2+ and projecting from pyrrhotite																				3 assuming all Fe is Fe2+ and projecting from pyrrhotite																				3 assuming all Fe is Fe2+ and projecting from pyrrhotite
		4 assuming all Fe is Fe2+ and projecting from pyrrhotite and ilmenite																				4 assuming all Fe is Fe2+ and projecting from pyrrhotite and ilmenite																				4 assuming all Fe is Fe2+ and projecting from pyrrhotite and ilmenite
		Mn# = Mn/(Mn+Ca+Fe2++Mn)																				Mn# = Mn/(Mn+Ca+Fe2++Mn)																				Mn# = Mn/(Mn+Ca+Fe2++Mn)
		Ca# = Ca/(Ca+Na)																				Ca# = Ca/(Ca+Na)																				Ca# = Ca/(Ca+Na)
[truncated: 17 more columns]

## Sheet: S4 Whole rock by min assembl
	Table S4. Whole rock analyses of metapelites from the Buchan block grouped by mineral assemblage, and some other metasedimentary rocks
			Bt zone	Crd±And	And-only	St±And	StCrd±And	Gneisses		Average Buchan (this study)			A&B82 Buchan			A&B82 Dalradian			V&M94 Metagreywacke
	no. samples (n)		7	18	6	11	7	3		52			37			214
	Wt %
	SiO2		57.0371	56.2206	53.1083	54.7	53.0343	53.6433		55.0258		SiO2	58.38			59.88			69.99
	TiO2		1.19457	1.13072	0.958333	0.996364	1.02314	1.32		1.08914		TiO2	1.09			1.03			0.7
	Al2O3		19.45	21.0711	24.3017	21.9691	23.3686	22.3333		21.8271		Al2O3	19.49			19.15			12.96
	All Fe as Fe2O3		7.63714	8.34424	8.08	9.17364	8.92857	10.18		8.59362		All Fe as Fe2O3	8.83043			8.2			5.36
	MnO		0.103143	0.0887222	0.09	0.108182	0.101714	0.143333		0.10045		MnO	0.12			0.12			0.06
	MgO		2.56	2.62611	2.515	3.20727	3.23286	3.02333		2.83491		MgO	2.84			2.34			2.36
	CaO		0.837143	0.970556	0.493333	1.47364	1.19429	1.27667		1.05061		CaO	1.56			1.03			1.67
	Na2O		1.93143	1.72389	0.943333	1.97909	2.04143	2.23333		1.79004		Na2O	2.31			2.1			2.95
	K2O		3.94714	4.16	5.19167	3.75727	3.86	3.27667		4.06953		K2O	3.17			3.5			2.41
	P2O5		0.199286	0.187111	0.125	0.23	0.254857	0.0933333		0.193045		P2O5	n/a			n/a			0.2
	LOI		3.53714	2.96111	3.69667	2.77091	2.78571	2.00667		2.99997		H2O	2.21			2.55			1.43
	Total		98.4341	99.4841	99.5033	100.365	99.8254	99.53		99.5742			100			99.9			100.09
	All Fe as FeO		6.87199	7.50825	7.27048	8.25455	8.03404	9.16009		7.73264		All Fe as FeO	7.95			7.39			4.82
								wt% Fe2O3 assuming XFe3+ = 0.15:1		1.29		Fe2O3 measured:	1.44			2.49			0.45
								wt% FeO assuming XFe3+ = 0.15:1		6.57		FeO measured:	6.65			5.15			4.42
												XFe3+ :	0.16			0.3			0.08
									Moles elements x 100; these values used as input to Theriak Domino for use with datasets HP5.5 and SPaC14	XFe3+ = 0.0	XFe3+ = 0.15		XFe3+ = 0.0	XFe3+ = 0.16		XFe3+ = 0.0	XFe3+ = 0.30		XFe3+ = 0.0	XFe3+ = 0.08
	Si		94.9274	93.5684	88.3887	91.0377	88.2654	89.2791		91.5798	91.5798		97.1624	97.1624		99.6588	99.6588		116.485	116.485
	Ti		1.49572	1.41577	1.19993	1.24754	1.28107	1.65277		1.36371	1.36371		1.36479	1.36479		1.28966	1.28966		0.876468	0.876468
	Al		38.1518	41.3317	47.6686	43.0931	45.8383	43.8076		42.8147	42.8147		38.2303	38.2303		37.5634	37.5634		25.4215	25.4215
	Fe2+		9.56516	10.4508	10.1198	11.4895	11.1826	12.75		10.7631	9.15*		11.06	9.26**		10.2869	7.17***		6.71582	6.16****
	Fe3+		0	0	0	0	0	0		0	1.61*		0	1.80**		0	3.12***		0	0.56****
	Mn		0.145401	0.125072	0.126873	0.152504	0.143387	0.202057		0.141604	0.141604		0.169164	0.169164		0.169164	0.169164		0.0845821	0.0845821
	Mg		6.35173	6.51576	6.24008	7.9577	8.02118	7.50132		7.03381	7.03381		7.04645	7.04645		5.80588	5.80588		5.8555	5.8555
	Ca		1.49285	1.73076	0.879743	2.62788	2.12972	2.27663		1.87352	1.87352		2.78189	2.78189		1.83676	1.83676		2.97805	2.97805
	Na		6.23253	5.56282	3.04404	6.38633	6.58748	7.20674		5.77629	5.77629		7.45414	7.45414		6.77649	6.77649		9.51935	9.51935
	K		8.3807	8.83265	11.0231	7.97756	8.19568	6.95712		8.64056	8.64056		6.73065	6.73065		7.43131	7.43131		5.11699	5.11699
	P^		0.42313	0.39728	0.265404	0.488343	0.541121	0.198168		0.409879	0.409879		n/a	n/a		n/a	n/a		0.208983	0.208983
	A'		0.0897204	0.132265	0.227235	0.143172	0.212713	0.142498		0.152	0.18		0.12	0.13		0.13	0.16		-0.31	-0.33
	Mg/(Mg+Fe2+)		0.400309	0.386899	0.381906	0.409933	0.414157	0.370485		0.396	0.43		0.39	0.43		0.36	0.45		0.47	0.49
	Mg/(Mg+Fe2+) -S-Ti ^^		0.465838	0.430554	0.413003	0.438099	0.45479	0.410163		0.4368	0.48		0.42	0.47		0.39	0.5		0.51	0.54
	Mn#		0.00839615	0.00645969	0.00747291	0.00686928	0.00682484	0.00880634		0.00714602	0.008		0.008	0.009		0.009	0.011		0.005	0.006
	Ca#		0.192407	0.242136	0.24409	0.30465	0.24338	0.225886		0.247498	0.25		0.27	0.27		0.21	0.21		0.24	0.24
									These values used as input to Theriak Domino for use with dataset HP6.2	XFe3+ = 0.0	XFe3+ = 0.15		XFe3+ = 0.0	XFe3+ = 0.16		XFe3+ = 0.0	XFe3+ = 0.30		XFe3+ = 0.0	XFe3+ = 0.08
									Si	91.5798	91.5798		97.1624	97.1624		99.6588	99.6588		116.485	116.485
									Ti	1.36371	1.36371		1.36479	1.36479		1.28966	1.28966		0.876468	0.876468
									Al	42.8147	42.8147		38.2303	38.2303		37.5634	37.5634		25.4215	25.4215
									Fe	10.7631	10.7631		11.06	11.06		10.2869	10.2869		6.71582	6.71582
									Mn	0.141604	0.141604		0.169164	0.169164		0.169164	0.169164		0.0845821	0.0845821
									Mg	7.03381	7.03381		7.04645	7.04645		5.80588	5.80588		5.8555	5.8555
									Ca	1.87352	1.87352		2.78189	2.78189		1.83676	1.83676		2.97805	2.97805
									Na	5.77629	5.77629		7.45414	7.45414		6.77649	6.77649		9.51935	9.51935
									K	8.64056	8.64056		6.73065	6.73065		7.43131	7.43131		5.11699	5.11699
									O	277.13	277.13		282.55	282.55		283.44	283.44		295.81	295.81
									"excess O"^^^		0.81			0.9			1.56			0.28
	A&B82 Buchan = average Buchan metapelite from Table 4 of Atherton & Brotherton (1982)
	A&B82 Dalradian = average Dalradian metapelite from Table 1 of Atherton & Brotherton (1982)
	V&M94 = average metagreywacke (CEVP) from Table 1 of Vielzeuf & Montel (1994)
	LOI = loss on ignition
	^ P ignored for thermodynamic modelling
	A' in molar AFM diagram projected from H2O, quartz, muscovite and plagioclase = (Al-3K-Na-2Ca)/2, normalised with Fe2 and Mg so that A'+F+M = 1.00
	^^ after projection from pyrrhotite and ilmenite
	Mn# = Mn/(Mn+Ca+Fe2++Mn)
	Ca# = Ca/(Ca+Na)
	XFe3 = Fe3+(mol)/FeTotal(mol)
	1 average value of measured XFe3+from Hudson (1975) analyses in Table S3
	* Assuming XFe3+ = 0.15 (Hudson, 1975)
	** Assuming XFe3+ = 0.17 (AB82 Buchan)
	*** Assuming XFe3+ = 0.30 (AB82 Dalradian)
	**** Assuming XFe3+ = 0.08 (V&M94)
	^^^ "excess oxygen" refers to the amount of oxygen that needs to be added to the Fe3+-free bulk composition to convert an amount of FeO to Fe2O3 to achieve the specified XFe3+

## Sheet: S5 Biotite
		Table S5. Average biotite compositions															Table S5. Average biotite compositions																Table S5. Average biotite compositions
	Wt %	15463	43852	43857	43860	43864	43867	43870	43873	43876	43901	43918	43919	43922	43929	43931	43939	43945	43993	44013	02-Bu-1	02-Bu-2	02-Bu-3	02-Bu-5A	02-Bu-5B	02-Bu-6B	07-Bu-1	07-Bu-2	07-Bu-4	07-Bu-7A	07-Bu-7B	07-Bu-10B	07-Bu-11	07-Bu-12A	07-Bu-12B	07-Bu-13	07-P-3	07-Y-2	07-Y-3B	07-Y-4	07-Y-6	07-Y-7	07-Y-9	07-Y-10	07-Y-11
	SiO2	35.66	36.12	35.89	35.48	35.13	35.88	36	35.13	35.2	35.16	35.53	35.77	34.69	36.59	34.84	34.4	34.49	34.76	35.04	36.6287	35.5315	35.2586	35.0667	35.6386	36.2236	36.9829	34.8096	34.855	35.5857	35.6618	34.7962	34.8336	34.8522	34.6526	35.5436	36.0583	34.7268	35.0852	34.8925	34.8142	34.8301	34.7068	33.7887	34.7375
	TiO2	1.6	1.71	1.31	1.51	1.46	1.46	n/a	1.35	1.27	1.33	1.89	1.87	2.19	2.15	2.85	1.47	1.72	1.44	1.86	1.39233	1.4395	1.2595	1.819	1.4256	1.32229	1.31101	1.43145	1.5498	2.2271	2.08433	2.80115	3.15158	1.7094	1.82575	1.50756	1.72283	1.48408	1.50473	1.453	2.9428	3.26525	2.0899	3.2115	2.95514
	Al2O3	20.77	18.41	19.51	19.03	19.28	18.32	19.86	20.47	21.12	20.06	19.93	19.45	19.01	19.73	18.61	19.76	19.61	20.78	19.57	19.171	20.271	20.4065	20.2947	20.7206	20.176	19.4384	20.3327	20.7071	20.1285	19.7643	20.0162	19.5194	19.8892	19.8492	20.8232	18.7862	19.6542	20.6764	20.1623	19.3739	19.9602	18.9765	16.9363	19.6703
	All Fe as FeO	21.52	20.32	19.64	22.06	21.17	20.84	21.45	18.21	21.17	19.65	19.84	18.71	20.44	18.22	19.66	20.6	20.47	21.55	20.92	19.2023	20.937	21.0309	21.493	20.3474	19.659	20.2245	22.0894	21.7588	19.6018	16.6244	20.9818	20.4119	21.3315	21.22	20.6706	16.8513	22.9854	23.4491	22.314	20.9326	19.8337	20.6969	23.5465	20.6546
	MnO	n/a	0.14	0.18	0.25	0.23	0.15	0.18	0.19	0.11	0.14	0.23	0.15	0.12	0.11	0.17	0.22	0.15	0.11	0.15	0.249	0.1575	0.10525	0.254	0.2982	0.162	0.097104	0.180455	0.1499	0.1703	0.0724444	0.342846	0.280333	0.1504	0.161917	0.155778	0.03775	0.137333	0.206545	0.222333	0.1239	0.138167	0.2274	0.3122	0.294364
	MgO	8.1	8.58	9.94	7.46	8.89	8.11	7.93	10.48	8.82	10.19	8.96	9.88	9.37	9.64	9.67	8.42	8.78	8.08	8.88	10.2103	7.897	8.96592	8.208	9.0172	9.99557	10.009	7.94836	8.1936	9.1529	11.2693	8.20477	7.98425	8.685	8.78292	8.90322	12.9251	8.18167	7.20618	7.83067	9.4418	8.89733	9.4815	8.5951	7.93645
	Na2O	0.48	n/a	n/a	0.11	n/a	n/a	n/a	n/a	n/a	n/a	0.34	0.28	0.01	0.3	0.09	n/a	0.32	n/a	n/a	0.109	0.3975	0.353833	0.255333	0.3236	0.255571	0.339354	0.350455	0.2902	0.2702	0.310333	0.185308	0.204667	0.2829	0.304917	0.314889	0.181917	0.226667	0.261091	0.284667	0.2515	0.180167	0.1554	0.1319	0.169682
	K2O	8.88	8.72	7.37	7.85	8.78	8.28	7.94	8.79	8.78	8.64	8.77	9.07	8.36	8.61	9.24	8.22	8.53	8.99	8.13	7.497	8.154	7.94508	8.37133	8.1912	7.55414	7.4356	7.95391	8.3171	8.5536	8.25467	9.165	9.12617	7.9616	8.12408	8.086	8.69083	8.34408	8.12591	8.0425	8.7936	9.13258	9.1865	9.3201	9.16241
	F	n/a	n/a	n/a	n/a	n/a	n/a	n/a	n/a	n/a	n/a	n/a	n/a	n/a	n/a	n/a	n/a	n/a	n/a	n/a	0.150333	0.0605	0.08225	0.091	0.1376	0.158143	0.01071	0.0689091	0.0536	0.0689	0.0242222	0.0131538	0.0163333	0.0075	0.00225	0.152556	0.0193333	0.149333	0.0919091	0.102833	0.0158	0.01525	0.014	0.0158	0.0119091
	Total	97.01	94	93.84	93.75	94.94	93.04	93.36	94.62	96.47	95.17	95.49	95.18	94.19	95.35	95.13	93.09	94.07	95.71	94.55	94.61	94.8455	95.4078	95.853	96.1	95.5063	95.8485	95.1653	95.8751	95.759	94.0659	96.5064	95.5282	94.8697	94.9236	96.1573	95.2736	95.8895	96.607	95.3048	96.6901	96.2528	95.5349	95.8581	95.5924
		Cations assuming 11 oxygen-equivalents															Cations assuming 11 oxygen-equivalents																Cations assuming 11 oxygen-equivalents
	Si	2.67471	2.78176	2.73505	2.75278	2.69665	2.79365	2.78686	2.66309	2.64838	2.66649	2.69145	2.7079	2.67211	2.74203	2.66406	2.68062	2.66559	2.64929	2.68546	2.76567	2.71199	2.67485	2.66305	2.67751	2.71608	2.76018	2.66469	2.64699	2.67983	2.68767	2.63312	2.65663	2.6658	2.65214	2.67031	2.69558	2.66055	2.66063	2.67225	2.62379	2.62561	2.65418	2.62972	2.65126
	Ti	0.0902547	0.099043	0.0750789	0.0881089	0.0842857	0.0854925	n/a	0.0769657	0.0718617	0.0758574	0.107673	0.106466	0.126867	0.121173	0.163895	0.0861489	0.0999734	0.0825405	0.107207	0.0790638	0.0826308	0.0718601	0.10389	0.0805496	0.0745644	0.0735863	0.0824102	0.0885152	0.126132	0.11814	0.159416	0.180766	0.0983324	0.105089	0.0851786	0.0968603	0.0855108	0.0858173	0.0836885	0.166797	0.185117	0.120198	0.187976	0.169624
	Al	1.83662	1.67153	1.75282	1.74066	1.74478	1.68164	1.81251	1.82942	1.87335	1.79353	1.77986	1.73589	1.72631	1.74311	1.67764	1.81531	1.78676	1.86716	1.76821	1.70652	1.82405	1.82511	1.817	1.83527	1.7835	1.71035	1.83498	1.85393	1.78702	1.75608	1.7857	1.75504	1.7935	1.79098	1.84432	1.65567	1.77521	1.84852	1.82043	1.72138	1.7739	1.71088	1.55398	1.76991
	All Fe as Fe2+	1.34993	1.30879	1.25172	1.43142	1.35907	1.35704	1.38872	1.1545	1.33209	1.24632	1.25692	1.18458	1.31676	1.14192	1.25726	1.34252	1.3231	1.37364	1.34089	1.21257	1.33649	1.33434	1.36508	1.27848	1.23279	1.26238	1.41419	1.38196	1.23453	1.04784	1.32788	1.30194	1.36457	1.35825	1.29876	1.05355	1.47277	1.48718	1.42921	1.31938	1.25042	1.32372	1.53264	1.3184
	Mn	0	0.00913295	0.0116192	0.01643	0.0149549	0.00989287	0.0118031	0.0122004	0.00701039	0.00899352	0.0147581	0.0096187	0.00782964	0.00698255	0.011011	0.0145215	0.00981981	0.00710154	0.00973772	0.0159254	0.0101828	0.00676343	0.0163392	0.0189771	0.0102891	0.00613882	0.0117011	0.00964271	0.0108632	0.00462476	0.0219761	0.01811	0.00974443	0.0104969	0.00991329	0.00239043	0.00891239	0.0132675	0.0144232	0.0079096	0.00882245	0.0147305	0.0205818	0.0190305
	Mg	0.905443	0.984784	1.12891	0.862597	1.01702	0.941071	0.914889	1.184	0.988983	1.15172	1.01153	1.11469	1.07565	1.07664	1.10198	0.977847	1.01129	0.917787	1.01426	1.14895	0.898295	1.0137	0.928976	1.00963	1.11697	1.11329	0.906791	0.927349	1.02724	1.26577	0.925312	0.907503	0.990032	1.0018	0.996851	1.44	0.93418	0.81442	0.893768	1.0605	0.999578	1.08062	0.996946	0.902739
	Na	0.0698098	0	0	0.0165486	0	0	0	0	0	0	0.0499402	0.041101	0.00149359	0.0435925	0.0133441	0	0.0479547	0	0	0.0159583	0.0588292	0.0520491	0.0375988	0.0471411	0.0371572	0.04911	0.0520188	0.0427331	0.0394546	0.0453505	0.0271903	0.0302663	0.0419576	0.0452503	0.0458711	0.0263694	0.0336725	0.0383914	0.0422729	0.0367529	0.0263348	0.0230435	0.0199051	0.0251113
	K	0.849745	0.856781	0.71654	0.777031	0.859848	0.822492	0.784179	0.850116	0.84278	0.835961	0.847563	0.875997	0.821556	0.82318	0.901403	0.817204	0.841068	0.874158	0.794926	0.722184	0.794012	0.768978	0.811076	0.785126	0.722632	0.708001	0.776801	0.805823	0.821792	0.793696	0.884818	0.887977	0.776925	0.79326	0.775026	0.828877	0.815581	0.786167	0.785809	0.845513	0.878314	0.896287	0.925424	0.892165
	Cation sum	7.77651	7.71182	7.67174	7.68557	7.7766	7.69128	7.69897	7.77029	7.76447	7.77887	7.7597	7.77624	7.74857	7.69862	7.7906	7.73417	7.78556	7.77167	7.72069	7.66685	7.71649	7.74766	7.74301	7.73269	7.69397	7.68303	7.74358	7.75695	7.72687	7.71917	7.76542	7.73823	7.74086	7.75726	7.72624	7.79931	7.78638	7.73439	7.74185	7.78202	7.74809	7.82367	7.86718	7.74824
	A'	-0.209861	-0.243691	-0.0909168	-0.152468	-0.213091	-0.206235	-0.132776	-0.182234	-0.164274	-0.175012	-0.218243	-0.254604	-0.183389	-0.209982	-0.282694	-0.158898	-0.201936	-0.197336	-0.150614	-0.113504	-0.160687	-0.12904	-0.167362	-0.142448	-0.0992603	-0.110173	-0.135103	-0.151765	-0.188762	-0.170655	-0.249466	-0.271104	-0.14151	-0.157545	-0.13059	-0.208346	-0.172743	-0.13618	-0.142928	-0.219119	-0.246582	-0.263985	-0.326252	-0.266033
	Mg/(Mg+Fe)1	0.40146	0.429366	0.474206	0.37602	0.428022	0.409497	0.397154	0.506307	0.426088	0.480276	0.445913	0.484802	0.44961	0.485288	0.467091	0.42142	0.433214	0.400532	0.430657	0.486529	0.401961	0.431722	0.404949	0.441251	0.475355	0.468621	0.390694	0.401569	0.454175	0.547096	0.410667	0.410738	0.420468	0.424482	0.434242	0.57749	0.388118	0.35385	0.38475	0.445609	0.444258	0.449446	0.394114	0.406431
		15463 and 43xxx analyses from Hudson (1975); all other analyses from Goldsmith (2017)															15463 and 43xxx analyses from Hudson (1975); all other analyses from Goldsmith (2017)																15463 and 43xxx analyses from Hudson (1975); all other analyses from Goldsmith (2017)
		n/a = not analysed															n/a = not analysed																n/a = not analysed
		A' in molar AFM diagram projected from H2O, quartz, muscovite and plagioclase = (Al-3K-Na-2Ca)/2, normalised with Fe2+ and Mg so that A'+F+M = 1.00															A' in molar AFM diagram projected from H2O, quartz, muscovite and plagioclase = (Al-3K-Na-2Ca)/2, normalised with Fe2+ and Mg so that A'+F+M = 1.00																A' in molar AFM diagram projected from H2O, quartz, muscovite and plagioclase = (Al-3K-Na-2Ca)/2, normalised with Fe2+ and Mg so that A'+F+M = 1.00
		1 assuming all Fe is Fe2+															1 assuming all Fe is Fe2+																1 assuming all Fe is Fe2+

## Sheet: S6 Muscovite
		Table S6. Average muscovite compositions															Table S6. Average muscovite compositions
	Wt %	43857	43865	43867	43876	02-Bu-1	02-Bu-2	02-Bu-3	02-Bu-5A	02-Bu-5B	02-Bu-6B	07-Bu-1	07-Bu-2	07-Bu-4	07-Bu-7A	07-Bu-7B	07-Bu-10B	07-Bu-11	07-Bu-12A	07-Bu-12B	07-Bu-13	07-P-3	07-Y-1	07-Y-2	07-Y-3B	07-Y-4	07-Y-6	07-Y-7	07-Y-9	07-Y-11
	SiO2	46.98	44.13	45.94	44.97	47.0455	45.8839	46.351	46.6246	47.1706	47.1326	47.5394	45.9345	46.5129	46.7939	45.9383	46.513	46.3598	46.963	46.4753	46.5834	46.727	46.5836	46.3824	45.6618	45.9873	46.7505	46.8304	46.4408	45.9665
	TiO2	0.18	0.56	0.4	n/a	0.278615	0.336552	0.319815	0.314408	0.328717	0.411084	0.297081	0.240608	0.294139	0.598316	0.429804	0.238033	0.925455	0.513069	0.455146	0.311317	0.55517	0.690787	0.261858	0.364802	0.50904	0.963176	1.05126	0.7	0.336353
	Al2O3	34.66	32.63	35.36	37.12	35.9972	34.9762	36.0325	37.1637	37.4504	37.3958	37.5092	36.2871	36.8521	37.2518	36.8163	36.9698	35.8108	37.5458	36.8967	37.4402	35.7024	34.5728	35.7744	36.4169	36.2853	36.3924	35.9821	35.1889	35.9125
	All Fe as FeO	0.87	1.19	1.64	0.86	1.25222	1.77624	1.16802	0.772371	0.72512	0.845859	0.869026	1.17853	0.984386	1.04019	0.836949	1.19418	1.33591	0.959059	0.915784	0.929318	1.12613	1.88644	2.25705	1.28193	0.92314	1.06176	0.980895	1.83675	1.074
	MgO	0.72	0.73	0.69	0.35	0.869835	0.8961	0.559118	0.447406	0.456143	0.475173	0.472476	0.498932	0.476301	0.519578	0.547077	0.55723	0.60358	0.462728	0.455832	0.456419	0.859936	1.08974	0.501135	0.405335	0.38077	0.489588	0.505632	0.47775	0.445029
	Na2O	0.37	0.37	0.34	n/a	0.488735	0.95481	1.52509	1.19905	1.22835	1.65841	1.49718	1.4593	1.32855	0.9888	1.32899	0.606052	0.719455	1.06373	1.05358	1.36321	1.10954	0.327883	1.24575	1.23558	1.35037	0.702529	0.524789	0.965437	0.612059
	K2O	9.56	9.44	9.2	8.52	9.50922	8.67826	8.32738	8.69925	9.06017	7.99887	8.84049	8.26616	8.64244	9.411	8.58211	10.3541	10.009	9.17189	8.91522	8.44857	8.87288	10.3848	8.95736	8.75591	8.99102	9.71129	10.1818	9.52506	10.0582
	F	n/a	n/a	n/a	n/a	0.0352489	0.0565029	0.0513713	0.067465	0.0416578	0.08652	0.049131	0.0455775	0.08652	0.0683233	0.0565029	0.049131	0.0513713	0.067465	0.0416578	0.0455775	0.0683233	0.0631733	0.05768	0.0400229	0.14241	0.0181176	0.0357368	0.0241875	0.0420635
	Total	93.34	89.05	93.57	91.82	95.4766	93.5586	94.3343	95.2883	96.4611	96.0042	97.074	93.9107	95.1773	96.6719	94.536	96.4815	95.8154	96.7467	95.2092	95.5781	95.0214	95.5993	95.4376	94.1622	94.5693	96.0894	96.0927	95.1589	94.4467
		Cations assuming 11 oxygen-equivalents															Cations assuming 11 oxygen-equivalents
	Si	3.15531	3.12639	3.08868	3.04865	3.09425	3.08622	3.07762	3.05768	3.06168	3.06344	3.06591	3.06257	3.06062	3.04268	3.03687	3.04751	3.06021	3.0441	3.05636	3.04516	3.08347	3.09278	3.07117	3.04423	3.0542	3.06008	3.07355	3.08523	3.07173
	Ti	2.74439	2.7253	2.80274	2.96675	2.79122	2.77349	2.82058	2.87331	2.86571	2.86549	2.85188	2.85224	2.85881	2.85562	2.86932	2.85565	2.78683	2.86914	2.8606	2.88539	2.77752	2.70606	2.79261	2.8623	2.84104	2.8083	2.78411	2.75601	2.82927
	Al	0.00909196	0.0298368	0.0202254	n/a	0.0137815	0.0170245	0.0159702	0.0155069	0.016046	0.0200944	0.0144091	0.0120646	0.014556	0.0292585	0.0213687	0.0117291	0.0459431	0.0250112	0.0225106	0.0153051	0.027552	0.0344918	0.0130398	0.018291	0.0254254	0.047414	0.0518894	0.0349737	0.0169041
	All Fe as Fe2+	0.0488679	0.0705069	0.092215	0.0487595	0.0688803	0.0999176	0.0648607	0.0423622	0.0393617	0.0459792	0.046872	0.0657145	0.0541722	0.0565656	0.0462728	0.065436	0.07375	0.0519904	0.0503675	0.0508064	0.0621494	0.104746	0.124988	0.0714764	0.0512747	0.0581232	0.0538406	0.10205	0.0600236
	Mg	0.0720682	0.077075	0.0691374	0.0353618	0.0852622	0.0898264	0.0553275	0.0437281	0.0441236	0.046028	0.0454116	0.0495758	0.0467088	0.0503499	0.0538991	0.054411	0.0593781	0.0447002	0.0446754	0.0444656	0.0845705	0.107825	0.0494524	0.0402736	0.0376881	0.0477593	0.049457	0.047301	0.0443213
	Na	0.048185	0.0508266	0.0443243	n/a	0.0623293	0.124527	0.19635	0.152473	0.154593	0.209008	0.187223	0.188657	0.16951	0.124668	0.170355	0.0769947	0.092086	0.133695	0.134347	0.172791	0.141969	0.0422101	0.159941	0.159726	0.173897	0.0891642	0.0667848	0.124363	0.0793078
	K	0.81916	0.853222	0.789135	0.736896	0.797928	0.744698	0.705416	0.727847	0.750251	0.663282	0.727384	0.703124	0.725526	0.780698	0.723813	0.865492	0.842913	0.758478	0.74799	0.704601	0.746994	0.879621	0.75668	0.744744	0.761816	0.810968	0.85255	0.807303	0.857517
	Cation sum	6.89707	6.93315	6.90645	6.83642	6.91366	6.9357	6.93612	6.91291	6.93177	6.91332	6.93909	6.93394	6.9299	6.93984	6.9219	6.97722	6.96111	6.92711	6.91685	6.91852	6.92422	6.96774	6.96788	6.94104	6.94535	6.92181	6.93218	6.95723	6.95908
	Mg/(Mg+Fe)1	0.595919	0.522253	0.428487	0.420367	0.553139	0.473409	0.460341	0.507933	0.528519	0.500265	0.492087	0.430008	0.463009	0.470932	0.538066	0.454004	0.446022	0.462301	0.470055	0.466723	0.576408	0.507244	0.283492	0.36039	0.423639	0.45106	0.478782	0.31671	0.424758
	K/(K+Na)	0.944445	0.943779	0.946819	n/a	0.927546	0.856738	0.782261	0.826798	0.829149	0.760392	0.795296	0.788449	0.810611	0.862301	0.809482	0.918307	0.901512	0.850147	0.847737	0.803063	0.840298	0.954211	0.82551	0.823404	0.814155	0.900943	0.927355	0.866515	0.915344
		15463 and 43xxx analyses from Hudson (1975); all other analyses from Goldsmith (2017)															15463 and 43xxx analyses from Hudson (1975); all other analyses from Goldsmith (2017)
		n/a = not analysed															n/a = not analysed
		1 assuming all Fe is Fe2+															1 assuming all Fe is Fe2+

## Sheet: S7 Chlorite
	Table S7. Average chlorite compositions
	Wt %		43852	43857	43858	43859	43860	02-Bu-1
	SiO2		24.3	25.01	24.9	24.42	23.22	25.357
	TiO2		0.13	0.08	0.06	0.06	0.09	0.049
	Al2O3		20.4	23.24	22.14	23.68	22.28	22.972
	All Fe as FeO		27.36	24.39	24.14	27.74	28.72	23.4553
	MnO		0.36	0.36	0.36	0.48	0.49	0.401667
	MgO		11.73	13.11	12.69	11.87	11.19	15.3293
	Total		84.28	86.19	84.29	88.25	85.99	87.5643
	Cations assuming 14 oxygen-equivalents
	Si		2.70991	2.66309	2.71393	2.588	2.55795	2.64502
	Ti		0.010903	0.00640645	0.00491819	0.00478216	0.00745637	0.003844
	Al		2.68205	2.9174	2.84488	2.95861	2.89356	2.825
	All Fe as Fe2+		2.55176	2.172	2.20045	2.45867	2.646	2.0462
	Mn		0.0340065	0.0324702	0.0332363	0.0430894	0.0457232	0.0354902
	Mg		1.94952	2.08045	2.0613	1.87478	1.83714	2.38307
	Cation sum		9.93816	9.87181	9.85872	9.92792	9.98782	9.93863
	A'		0.229537	0.255413	0.250245	0.254493	0.24398	0.241793
	Mg/(Mg+Fe)1		0.433104	0.489235	0.483675	0.43263	0.409788	0.538027
	43xxx analyses from Hudson (1975); all other analyses from Goldsmith (2017)
	n/a = not analysed
	1 assuming all Fe is Fe2+

## Sheet: S8 Cordierite
	Table S8. Average cordierite compositions
	Wt %		43873	43876	43901	43993	44013	44029	02-Bu-3	07-Bu-1	07-Bu-4
	SiO2		47.36	47.39	46.72	47.32	47.3	47.45	47.0719	47.8547	48.0097
	TiO2		0.02	0.02	0.02	0.04	0.02	0.02	0.00369231	0.00311111	0
	Al2O3		33.49	34.18	30.07	32.99	32.91	34.28	32.068	32.6739	33.584
	All Fe as FeO		7.78	9.23	9.25	10.01	9.8	9.99	8.71062	8.76578	9.13967
	MnO		0.53	0.34	0.14	0.5	0.73	0.53	0.387077	0.340111	0.444333
	MgO		8.29	6.93	6.6	6.61	7.24	6.8	7.19162	7.431	7.24633
	Na2O		n/a	n/a	n/a	n/a	n/a	n/a	0.653923	0.485778	0.333333
	K2O		0.02	0.05	0.04	0.04	0.06	n/a	0.234769	0.0655556	0.000666667
	Total		97.49	98.14	92.84	97.51	98.06	99.07	96.3216	97.6199	98.758
	Cations assuming 18 oxygens
	Si		4.91889	4.91281	5.11618	4.95918	4.93619	4.89487	4.98831	4.99008	4.95259
	Ti		0.00156221	0.0015593	0.00164713	0.00315269	0.0015697	0.00155164	0.000294269	0.00024398	0
	Al		4.1007	4.17737	3.88208	4.07601	4.04899	4.16902	4.00637	4.01672	4.08435
	All Fe as Fe2+		0.675788	0.800241	0.84715	0.877354	0.855327	0.861879	0.771998	0.76445	0.788514
	Mn		0.0466275	0.0298561	0.0129862	0.0443861	0.0645304	0.0463119	0.0347456	0.0300411	0.0388261
	Mg		1.23363	1.03125	0.982143	0.983631	1.07738	1.0119	1.07018	1.1058	1.07832
	Na		n/a	n/a	n/a	n/a	n/a	n/a	0.104128	0.0761153	0.0516693
	K		0.00265013	0.00661295	0.00558836	0.00534819	0.00798846	n/a	0.0317405	0.00872116	8.77391e-05
	Cation sum		10.9798	10.9597	10.8478	10.9491	10.992	10.9855	11.0078	10.9922	10.9944
	Mg/(Mg+Fe)1		0.646077	0.563066	0.536898	0.528554	0.557446	0.540033	0.580932	0.591259	0.577621
	43xxx analyses from Hudson (1975); all other analyses from Goldsmith (2017)
	n/a = not analysed		Ca analysed, but does not exceed 0.01 cations
	1 assuming all Fe is Fe2+

## Sheet: S9 Staurolite
	Table S9. Average staurolite compositions
	Wt %		15463	43929	43939	43945	02-Bu-5A	02-Bu-5B	02-Bu-6B	07-Bu-4	07-Bu-12A	07-Bu-12B	07-Bu-13	07-P-3
	SiO2		28.64	27.87	25.73	27.14	27.7235	27.45	28.0077	27.1558	26.8106	26.3555	27.6919	28.1855
	TiO2		0.55	0.7	n/a	0.45	0.5755	0.4435	0.601667	0.4245	0.5	0.513917	0.49575	0.530727
	Al2O3		53.5	53.27	51.95	53.99	54.179	55.481	54.79	55.3685	54.3618	54.881	55.1074	54.0267
	All Fe as FeO		13.46	12.94	13.38	13.37	14.136	13.7382	14.705	14.2652	14.3818	14.386	14.6	12.2743
	MnO		0.56	0.4	0.43	0.4	0.6685	0.7625	0.486333	0.39975	0.423923	0.395667	0.464	0.0800909
	MgO		1.38	1.49	1.45	1.46	1.467	1.54133	1.41933	1.37275	1.28192	1.25425	1.607	1.34427
	ZnO		n/a	n/a	n/a	n/a	0.601	0.7915	0.258333	0.89925	0.779385	0.805583	0.145	0.618364
	Total		98.09	96.67	92.94	96.81	99.3505	100.208	100.268	99.8857	98.5394	98.5919	100.111	97.0599
	Cations assuming 23 oxygen-equivalents
	Si		3.95618	3.89964	3.76832	3.80323	3.81486	3.74239	3.81549	3.72119	3.72846	3.66541	3.77566	3.91693
	Ti		0.0571374	0.0736616	n/a	0.0474254	0.0595568	0.0454732	0.0616431	0.0437475	0.0522935	0.0537526	0.0508345	0.0554687
	Al		8.71252	8.78735	8.96978	8.91957	8.7892	8.91741	8.79959	8.94479	8.91259	8.99831	8.85804	8.85151
	All Fe as Fe2+		1.55497	1.51425	1.63885	1.56693	1.62679	1.56643	1.67538	1.63484	1.67267	1.67327	1.66483	1.42657
	Mn		0.0655242	0.0474088	0.0533443	0.0474804	0.077919	0.0880557	0.0561201	0.0464002	0.0499368	0.0466114	0.0535882	0.00942791
	Mg		0.284095	0.31071	0.316489	0.304914	0.300845	0.313173	0.288164	0.280345	0.265684	0.259966	0.326541	0.278413
	Zn		n/a	n/a	n/a	n/a	0.0610646	0.0796787	0.0259859	0.0909882	0.0800311	0.0827268	0.014598	0.0634526
	Cation sum		14.6304	14.633	14.7468	14.6896	14.7302	14.7526	14.7224	14.7623	14.7617	14.7801	14.7441	14.6018
	Mg/(Mg+Fe)1		0.154478	0.170256	0.161858	0.162895	0.156069	0.166617	0.146757	0.14638	0.137067	0.134472	0.163978	0.163294
	Zn#		n/a	n/a	n/a	n/a	0.029548	0.0389182	0.012703	0.0443289	0.0386937	0.0401085	0.00708794	0.0356904
	Mn#		0.0344033	0.0253202	0.0265568	0.024738	0.0377035	0.0430099	0.0274338	0.0226059	0.0241436	0.0225986	0.0260194	0.00530295
	43xxx analyses from Hudson (1975); all other analyses from Goldsmith (2017)
	n/a = not analysed		Ca analysed, but does not exceed 0.01 cations
	1 assuming all Fe is Fe2+
	Zn# = Zn/(Fe+Mn+Mg+Zn)
	Mn# = Mn/(Fe+Mn+Mg+Zn)

## Sheet: S10 Garnet
	Table S10. Garnet compositions
			15463	43918	43939	43939	43945	02-Bu-5B	02-Bu-5B	02-Bu-6B	02-Bu-6B	07-Bu-11	07-Bu-11	07-Bu-12A	07-Bu-12A	07-Bu-12B	07-Bu-12B	07-Bu-13	07-Bu-13	07-P-3	07-P-3
	Wt %				core	rim		core	rim	core	rim	core	rim	core	rim	core	rim	core	rim	core	rim
	SiO2		36.96	37.12	36.06	36.14	36.57	36.9745	36.6224	36.55	37.146	36.3032	36.6423	36.718	35.937	36.399	36.569	36.09	36.534	37.4211	37.5103
	TiO2		n/a	0.02	0.00433333	0	0.03	0	0.038328	0.017	0.002	0	0.011906	0.036	0	0.118	0.002	0.0543333	0.008	0.057289	0.036877
	Al2O3		21.26	20.45	20.94	21.01	21.13	20.7006	20.6598	20.937	21.217	20.4194	20.4817	20.829	20.703	20.682	20.916	20.8323	20.9983	20.719	20.8691
	All Fe as FeO		32.32	28.4	32.44	33.26	31.7	28.0979	27.1024	31.285	31.115	29.8394	29.7285	30.778	31.815	31.242	32.257	29.814	32.0077	29.5843	32.719
	MnO		8.36	9.99	6.76	6.96	7.2	11.1911	12.2139	8.426	7.907	7.93941	8.66232	7.138	7.404	6.58	6.757	9.766	7.51167	3.83665	0.90785
	MgO		2.19	1.75	1.86	2.15	2.11	1.7824	1.41064	2.089	2.69	2.89995	2.47174	2.137	1.657	2.123	2.041	2.06267	2.30967	2.52302	3.32589
	CaO		1.33	1.68	1.55	1.55	1.53	1.2248	1.26571	1.468	1.334	0.765487	0.785663	1.665	1.36	1.535	1.179	1.292	1.00933	4.70075	3.8157
	Total		102.42	99.41	99.6143	101.07	100.27	99.9713	99.3132	100.772	101.411	98.1668	98.7841	99.301	98.876	98.679	99.721	99.9113	100.379	98.8421	99.1847
	Cations assuming 12 oxygens
	Si		2.95058	3.02906	2.95481	2.93006	2.96623	3.00803	3.00373	2.96074	2.97221	2.99328	3.00659	2.99576	2.96814	2.99046	2.98249	2.95081	2.96485	3.02685	3.01775
	Ti		0	0.00122743	0.00026705	0	0.00183007	0	0.00236426	0.00103569	0.000120355	0	0.000734723	0.00220901	0	0.00729117	0.000122677	0.00334108	0.000488272	0.00348507	0.00223128
	Al		2.0009	1.96734	2.02287	2.00818	2.02053	1.98541	1.99769	1.99947	2.00142	1.98488	1.98128	2.00348	2.01587	2.00322	2.01109	2.00807	2.00899	1.97574	1.97935
	All Fe as Fe2+		2.15785	1.93818	2.2231	2.2552	2.15037	1.91174	1.85907	2.11946	2.08215	2.05764	2.04005	2.10012	2.19761	2.14666	2.20022	2.03868	2.17237	2.00129	2.20144
	Mn		0.260556	0.212823	0.227142	0.259782	0.255061	0.216106	0.172429	0.252193	0.320775	0.356349	0.302257	0.259845	0.203961	0.259945	0.248079	0.251342	0.279342	0.304142	0.398769
	Mg		0.565317	0.69052	0.469204	0.477979	0.494678	0.771195	0.848553	0.578157	0.535908	0.554501	0.602056	0.493306	0.517988	0.457916	0.4668	0.676367	0.51636	0.262868	0.0618668
	Ca		0.11377	0.146896	0.136093	0.134655	0.132976	0.10677	0.111237	0.127421	0.114373	0.0676305	0.0690764	0.145561	0.12036	0.135132	0.103034	0.113193	0.0877691	0.407421	0.328934
	Cation sum		8.04897	7.98604	8.03349	8.06585	8.02168	7.99926	7.99507	8.03848	8.02696	8.01428	8.00204	8.00029	8.02393	8.00063	8.01184	8.04181	8.03017	7.9818	7.99035
	Mg/(Mg+Fe)1		0.107739	0.0989416	0.0927018	0.103293	0.106035	0.101561	0.0848777	0.106337	0.133494	0.147618	0.129043	0.110105	0.0849282	0.108013	0.101327	0.109755	0.113937	0.131924	0.15336
	X alm		0.696644	0.648563	0.727564	0.721061	0.708972	0.636015	0.621495	0.688755	0.681955	0.67772	0.676984	0.700313	0.722917	0.715636	0.729	0.662	0.710891	0.67254	0.736019
	X sps		0.182508	0.231065	0.153558	0.152825	0.163094	0.256568	0.283674	0.187882	0.175523	0.182635	0.199791	0.164499	0.170396	0.152656	0.154665	0.219629	0.168974	0.0883374	0.0206842
	X prp		0.0841182	0.0712161	0.0743378	0.0830605	0.0840927	0.0718961	0.0576438	0.0819546	0.105062	0.11737	0.100303	0.0866488	0.0670942	0.0866582	0.0821964	0.0816155	0.0914123	0.102208	0.133322
	X grs		0.0367297	0.0491552	0.0445398	0.0430535	0.0438417	0.035521	0.037187	0.0414077	0.0374601	0.0222753	0.0229228	0.0485392	0.0395933	0.0450493	0.0341384	0.0367559	0.0287217	0.136915	0.109974
	15463 and 43xxx analyses from Hudson (1975); all other analyses from Goldsmith (2017)
	n/a = not analysed
	1 assuming all Fe is Fe2+
	X alm = Fe2+/(Fe2++Mn+Mg+Ca)
	X sps = Mn/(Fe2++Mn+Mg+Ca)
	X prp = Mg/(Fe2++Mn+Mg+Ca)
	X grs = Ca/(Fe2++Mn+Mg+Ca)

[truncated: 3 more sheets: S11 Plagioclase, S12 Monazite - microprobe, S13 Monazite - isotopic]
